# Supplementary material for: Stabilizing Si/graphite composites with Cu and in situ synthesized carbon nanotubes for high-performance Li-ion battery anodes
Source: Royal Society of Chemistry journal article supplement (doi:10.1039/c8qi00173a), 2018-01-01
Supplement: c8qi00173a1.pdf [file c8qi00173a1.pdf]

## Supplementary material

SStabilizing Si/graphite composite by Cu and *in situ* synthesized carbon  
nanotubes for high-performance Li-ion battery anodes

Tianjun Xu, Ning Lin\*, Wenlong Cai, Zheng Yi, Jie Zhou, Ying Han, Yongchun Zhu\* and Yitai Qian\*

Hefei National Laboratory for Physical Science at Microscale, Department of Chemistry, University of  
Science and Technology of China, 96 JinZhai Road, 230026, Hefei, China.

\* Corresponding author:

Nin Lin, E-mail: [ningl@mail.ustc.edu.cn](mailto:ningl@mail.ustc.edu.cn); Yongchun Zhu, E-mail: [yhzhu@ustc.edu.cn](mailto:yhzhu@ustc.edu.cn); Yitai Qian, E-  
mail: [ytqian@ustc.edu.cn](mailto:ytqian@ustc.edu.cn)

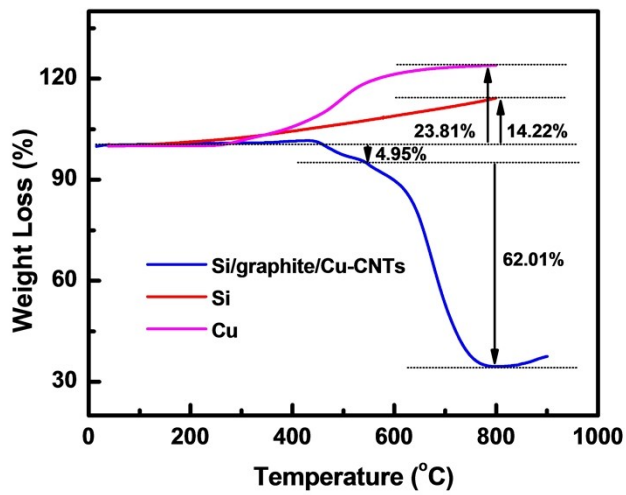

**Fig. S1** The TGA curves of pure Si, pure Cu and Si/graphite/Cu-CNTs composite measured under air atmosphere.

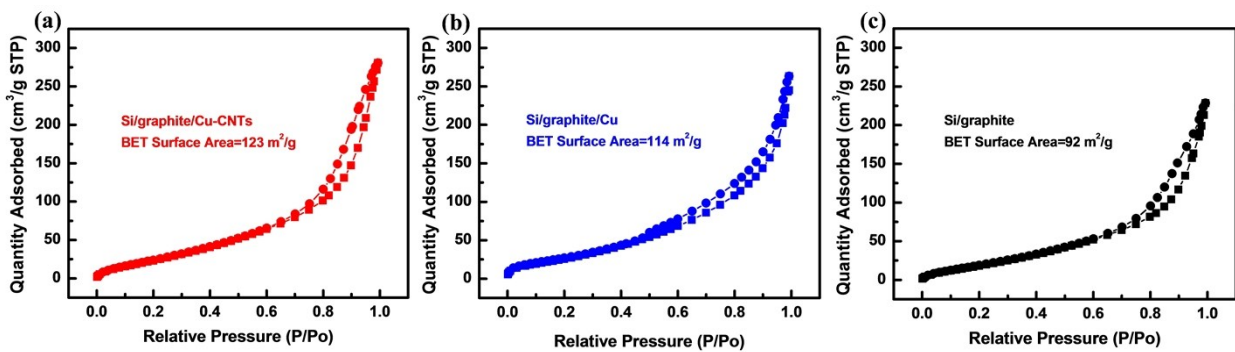

**Fig. S2** N<sub>2</sub> adsorption-desorption isotherms of (a) Si/graphite/Cu-CNTs, (b) Si/graphite/Cu, (c) Si/graphite.

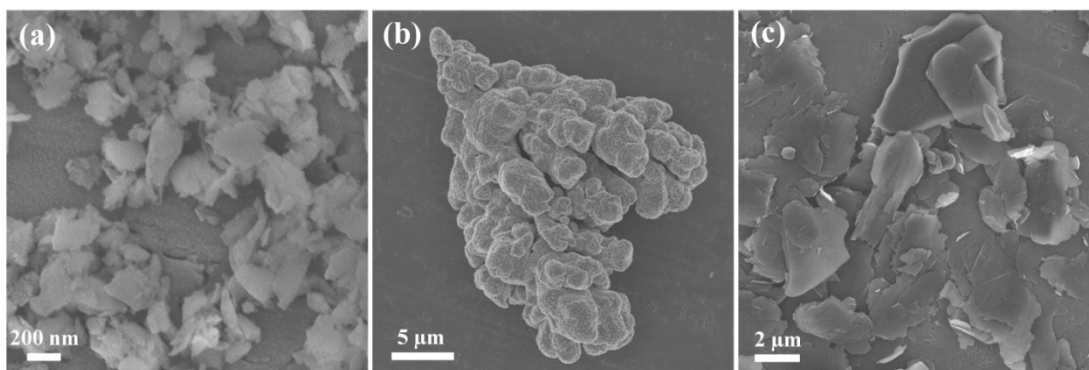

**Fig. S3** The SEM images of (a) ball-milled Si nanoparticles, (b) copper powder, (c) graphite.

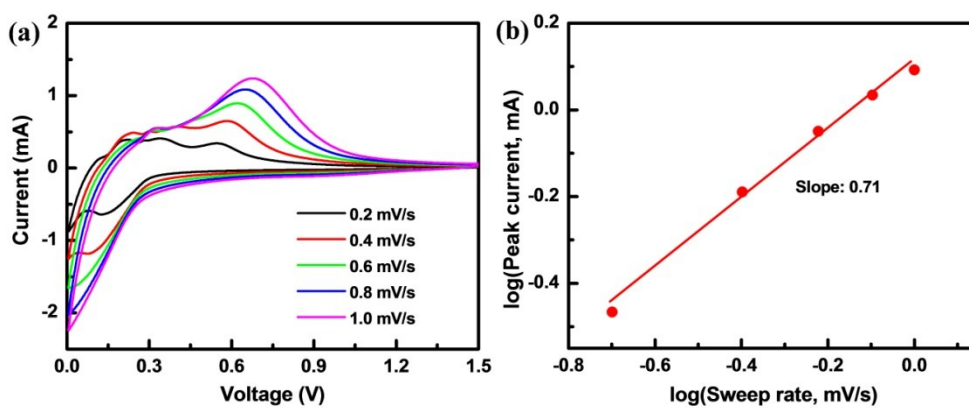

**Fig. S4** (a) CV curves of Si/graphite/Cu-CNTs at sweeping rates from 0.2 mV s<sup>-1</sup> to 1.0 mV s<sup>-1</sup>. (b) Corresponding log (i) vs. log(v) plots.

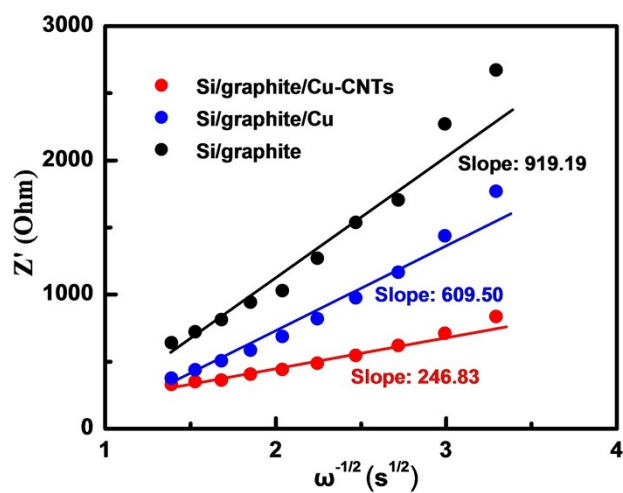

**Fig. S5** The Warburg coefficient plots of the the Si/graphite/Cu-CNTs, Si/graphite/Cu and Si/graphite electrodes.

**Table. S1.** Impedance parameters simulated from the equivalent circuits.

| Sample              | Rs (Ω) | Rct (Ω) |
|---------------------|--------|---------|
| Si/graphite         | 40.53  | 189.9   |
| Si/graphite/Cu      | 27.78  | 110     |
| Si/graphite/Cu-CNTs | 20.38  | 75.59   |
